# Supplementary material for: Implementing Pharmacogenetic Testing in Gastrointestinal Cancers (IMPACT-GI): Study Protocol for a Pragmatic Implementation Trial for Establishing DPYD and UGT1A1 Screening to Guide Chemotherapy Dosing
Source: PubMed Central journal article supplement (PMC9295185; doi:10.3389/fonc.2022.859846), 2022-07-05
Supplement: DataSheet_1.pdf [file DataSheet_1.pdf]

# Perceptions of Pharmacogenetic Testing in Patients with GI Cancers

Please complete the survey below. The survey should take about 15 minutes to complete.

Thank you!

---

1. First name

---

---

2. Last name

---

---

3. Please enter your age:

---

---

4. What is the highest degree or level of school you have completed?

- Less than high school
- High school graduate (or GED)
- Some college/university
- College/university graduate
- Post college/university degree
- Choose not to respond

---

5. What is your marital status?

- Married
- Living as married/Domestic Partnership
- Divorced
- Widowed
- Separated
- Never been married

---

6. What is your combined annual income (total pre-tax income from all sources earned in the past year)?

- \$0-\$9,999
- \$10,000-\$14,999
- \$15,000-\$19,999
- \$20,000-\$34,999
- \$35,000-\$49,999
- \$50,000-\$74,999
- \$75,000-\$99,999
- \$100,000-\$199,999
- \$200,000 or more
- Choose not to respond

---

7. How confident are you in filling out forms in a doctor's office by yourself?

- Extremely
- Quite a bit
- Somewhat
- A little bit
- Not at all

---

8. Over the past month how would you describe your health?

- Poor
- Fair
- Good
- Very Good
- Excellent

---

9. Have you ever had a bad reaction from chemotherapy or immunotherapy? (select all that apply)

- Yes, Chemotherapy  
 Yes, Immunotherapy  
 No, I have NEVER had a bad reaction from either chemotherapy or immunotherapy  
 I am unsure

---

9b. How would you describe your reaction to chemotherapy or immunotherapy?

- I have had a bad reaction from chemotherapy or immunotherapy that led to me STOPPING it.  
 I have had a bad reaction from chemotherapy or immunotherapy that led to a DOSE REDUCTION.  
 I have had a bad reaction from chemotherapy or immunotherapy that did not lead to any changes in my treatment.  
 I am unsure

---

10. Apart from chemotherapy or immunotherapy, have you ever had a bad reaction from a medicine?

- Yes, I have had a bad reaction from a medicine that led me to STOPPING it  
 Yes, I have had a bad reaction from a medicine that led to a DOSE REDUCTION  
 No, I have NEVER had a bad reaction from a medicine  
 I am unsure

---

11. Apart from chemotherapy or immunotherapy, have you ever been hospitalized from a bad reaction to a medicine?

- Yes, I have been hospitalized due to a bad reaction to a medicine  
 No, I have NEVER been hospitalized due to a bad reaction to a medicine  
 I am unsure

---

11b. If you answered yes to either question 10 or 11, which medication caused the reaction?

\_\_\_\_\_ (If you do not remember, leave field blank)

---

12. Have you, or anyone in your family, ever had a genetic test to predict or diagnose a disease or condition?

- Yes  
 No  
 I am unsure

---

13. Have you, or anyone in your family, ever had a pharmacogenetic test for the purpose of medication management?

- Yes  
 No  
 I am unsure

The following section includes questions about the role of genetics in health and disease. When we refer to a variant, we are referring to a difference in your DNA, which may or may not impact your health.

Please check a circle to indicate how much you agree or disagree with each statement.

|                                                                                                                                             | Strongly Disagree     | Disagree              | Neither Agree nor Disagree | Agree                 | Strongly Agree        |
|---------------------------------------------------------------------------------------------------------------------------------------------|-----------------------|-----------------------|----------------------------|-----------------------|-----------------------|
| 14. A health care provider can always tell a person their exact chance of developing a disease based on their results from genetic testing. | <input type="radio"/> | <input type="radio"/> | <input type="radio"/>      | <input type="radio"/> | <input type="radio"/> |
| 15. If a person has a variant in a gene that increases their risk of a disease, they may not develop that disease.                          | <input type="radio"/> | <input type="radio"/> | <input type="radio"/>      | <input type="radio"/> | <input type="radio"/> |
| 16. Genetic testing may find variants in a person's genes that could determine how they respond to certain medicines.                       | <input type="radio"/> | <input type="radio"/> | <input type="radio"/>      | <input type="radio"/> | <input type="radio"/> |
| 17. A person's health habits, like diet and exercise, can affect whether or not their genes can cause disease.                              | <input type="radio"/> | <input type="radio"/> | <input type="radio"/>      | <input type="radio"/> | <input type="radio"/> |
| 18. Cancer can be caused by genes inherited from parents.                                                                                   | <input type="radio"/> | <input type="radio"/> | <input type="radio"/>      | <input type="radio"/> | <input type="radio"/> |
| 19. Cancer can be caused by changes in genes over a person's lifetime.                                                                      | <input type="radio"/> | <input type="radio"/> | <input type="radio"/>      | <input type="radio"/> | <input type="radio"/> |
| 20. I am confident in my ability to understand information about genetics.                                                                  | <input type="radio"/> | <input type="radio"/> | <input type="radio"/>      | <input type="radio"/> | <input type="radio"/> |

**A pharmacogenetic test is a type of genetic test that could allow doctors to choose the right medication that will work for a patient or avoid using certain medications that may cause side effects.**

**To what extent do you agree or disagree with the following statements?**

|                                                                                                                                                        | Strongly Disagree     | Disagree              | Neither Agree nor Disagree | Agree                 | Strongly Agree        |
|--------------------------------------------------------------------------------------------------------------------------------------------------------|-----------------------|-----------------------|----------------------------|-----------------------|-----------------------|
| 21. I would agree to a pharmacogenetic test, if it could predict whether a medication would work for my condition.                                     | <input type="radio"/> | <input type="radio"/> | <input type="radio"/>      | <input type="radio"/> | <input type="radio"/> |
| 22. I would agree to a pharmacogenetic test, if it could predict the correct dose of the medication that I needed.                                     | <input type="radio"/> | <input type="radio"/> | <input type="radio"/>      | <input type="radio"/> | <input type="radio"/> |
| 23. I would agree to a pharmacogenetic test, if it could predict whether I would have a mild side effect to a drug.                                    | <input type="radio"/> | <input type="radio"/> | <input type="radio"/>      | <input type="radio"/> | <input type="radio"/> |
| 24. I would agree to a pharmacogenetic test, if it could predict whether I would have a serious side effect to a drug.                                 | <input type="radio"/> | <input type="radio"/> | <input type="radio"/>      | <input type="radio"/> | <input type="radio"/> |
| 25. I would agree to a pharmacogenetic test, if it could explain a family history of medication side effects or nonresponse.                           | <input type="radio"/> | <input type="radio"/> | <input type="radio"/>      | <input type="radio"/> | <input type="radio"/> |
| 26. I would agree to a pharmacogenetic test, if my healthcare provider recommended it.                                                                 | <input type="radio"/> | <input type="radio"/> | <input type="radio"/>      | <input type="radio"/> | <input type="radio"/> |
| 27. It is important that my healthcare provider tells me about pharmacogenetic tests before any of them are done.                                      | <input type="radio"/> | <input type="radio"/> | <input type="radio"/>      | <input type="radio"/> | <input type="radio"/> |
| 28. If a pharmacogenetic test will be performed with my usual blood work, it is important that my healthcare provider obtains my consent for the test. | <input type="radio"/> | <input type="radio"/> | <input type="radio"/>      | <input type="radio"/> | <input type="radio"/> |

**A pharmacogenetic test is a type of genetic test that could allow doctors to choose the right medication that will work for a patient or avoid using certain medications that may cause side effects.**

**To what extent do you agree or disagree with the following statements?**

|                                                                                                                                                             | Strongly Disagree     | Disagree              | Neither Agree nor Disagree | Agree                 | Strongly Agree        |
|-------------------------------------------------------------------------------------------------------------------------------------------------------------|-----------------------|-----------------------|----------------------------|-----------------------|-----------------------|
| 29. Prior to undergoing a pharmacogenetic test, I would want to know how the test results could affect my treatment.                                        | <input type="radio"/> | <input type="radio"/> | <input type="radio"/>      | <input type="radio"/> | <input type="radio"/> |
| 30. Prior to undergoing a pharmacogenetic test, I would be concerned whether a possible result would make it more difficult to find an effective treatment. | <input type="radio"/> | <input type="radio"/> | <input type="radio"/>      | <input type="radio"/> | <input type="radio"/> |
| 31. Prior to undergoing a pharmacogenetic test, I would be concerned whether a possible result would delay my treatment.                                    | <input type="radio"/> | <input type="radio"/> | <input type="radio"/>      | <input type="radio"/> | <input type="radio"/> |
| 32. Prior to undergoing a pharmacogenetic test, I would be concerned whether a possible result would limit the treatment options made available to me.      | <input type="radio"/> | <input type="radio"/> | <input type="radio"/>      | <input type="radio"/> | <input type="radio"/> |
| 33. If I had to pay for a pharmacogenetic test myself, the financial cost of the test would be of concern to me.                                            | <input type="radio"/> | <input type="radio"/> | <input type="radio"/>      | <input type="radio"/> | <input type="radio"/> |
| 34. If I had a pharmacogenetic test, I would be concerned that insurance companies may use the pharmacogenetic test results to deny healthcare coverage.    | <input type="radio"/> | <input type="radio"/> | <input type="radio"/>      | <input type="radio"/> | <input type="radio"/> |
| 35. If I had a pharmacogenetic test, I would be concerned about the effect of the pharmacogenetic test results on my employment opportunities.              | <input type="radio"/> | <input type="radio"/> | <input type="radio"/>      | <input type="radio"/> | <input type="radio"/> |
